# Supplementary material for: Enhanced Antiproliferative Effect of Combined Treatment with Calcitriol and All-Trans Retinoic Acid in Relation to Vitamin D Receptor and Retinoic Acid Receptor α Expression in Osteosarcoma Cell Lines
Source: MDPI journal article supplement (doi:10.3390/ijms21186591), 2020-09-09

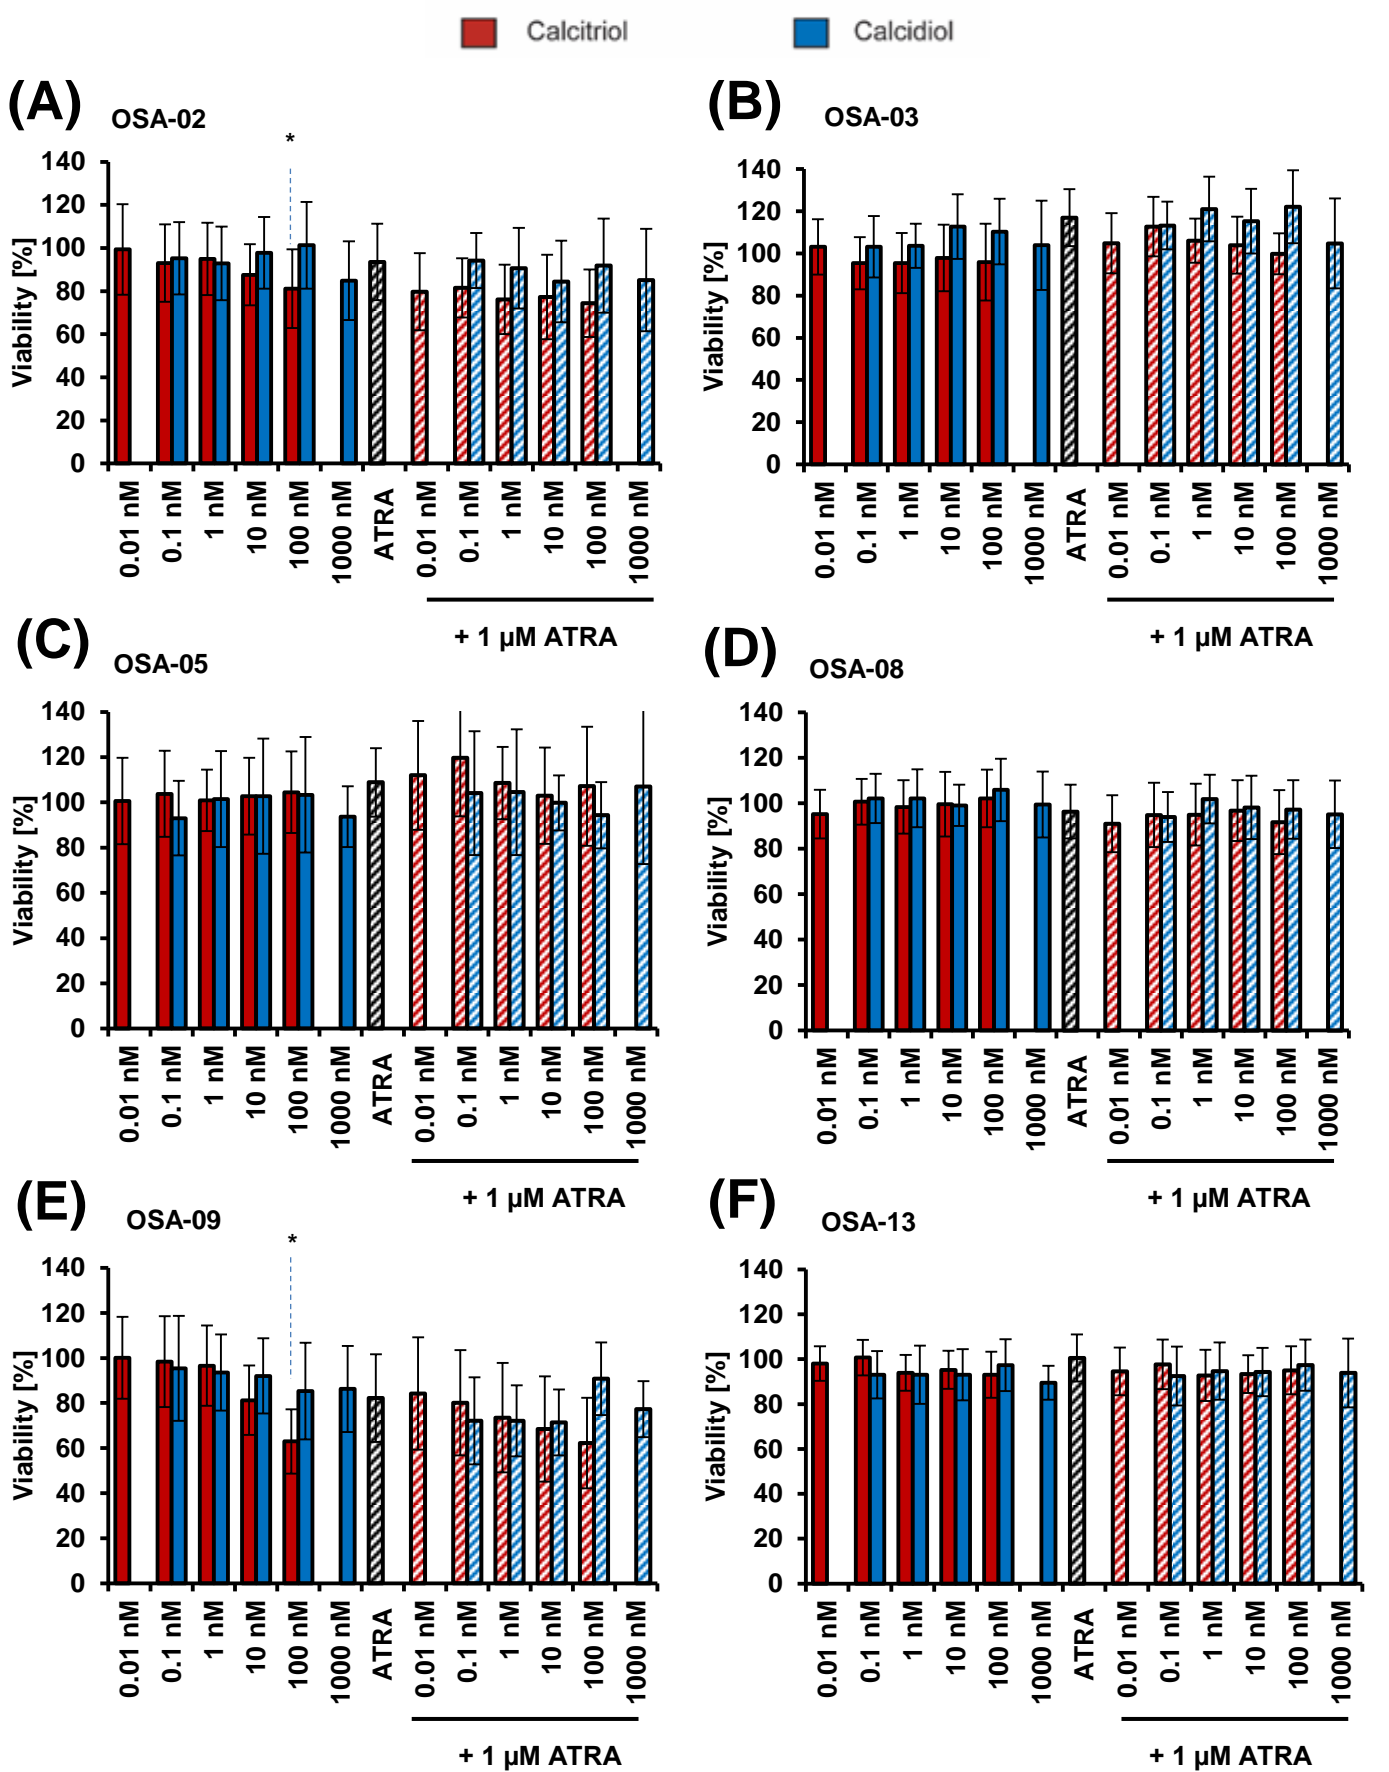

**Supplement 1: Proliferation of patient-derived osteosarcoma cell lines after 3 days of selected treatment.** The proliferation of the OSA-02 (A), OSA-03 (B), OSA-05 (C), OSA-08 (D), OSA-09 (E), and OSA-13 (F) cell lines was measured using the MTT assay on day 3 of incubation with various concentrations of calcitriol or calcidiol alone, 1  $\mu$ M ATRA alone or drug combinations. The values were compared with those in untreated cells, whose proliferation activity was set as 100%. The data represent the mean  $\pm$  SD. The results were analyzed using one-way ANOVA followed by the Scheffé post hoc test. The proliferation of cells treated with calcitriol or calcidiol alone was compared to the proliferation of untreated control cells: \*  $P < 0.05$ , \*\* $P < 0.001$ . The proliferation of cells treated with a combination of drugs was compared to the proliferation of cells treated with ATRA alone:  $\Delta < 0.05$ ,  $\Delta\Delta < 0.001$ . Experiments were performed in biological triplicates.

OSA-02

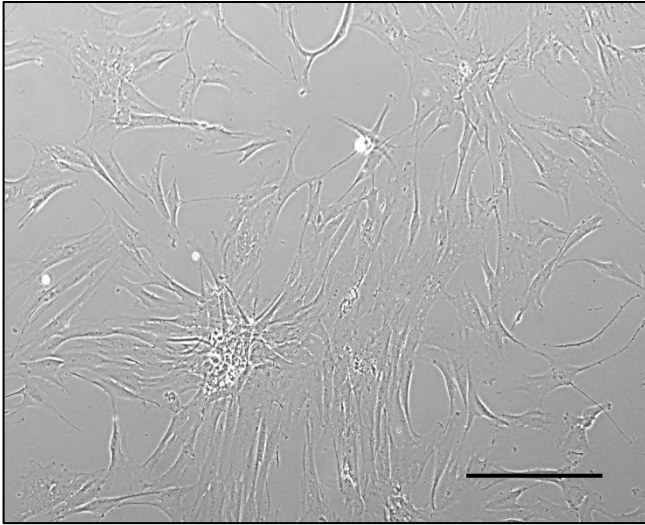

OSA-03

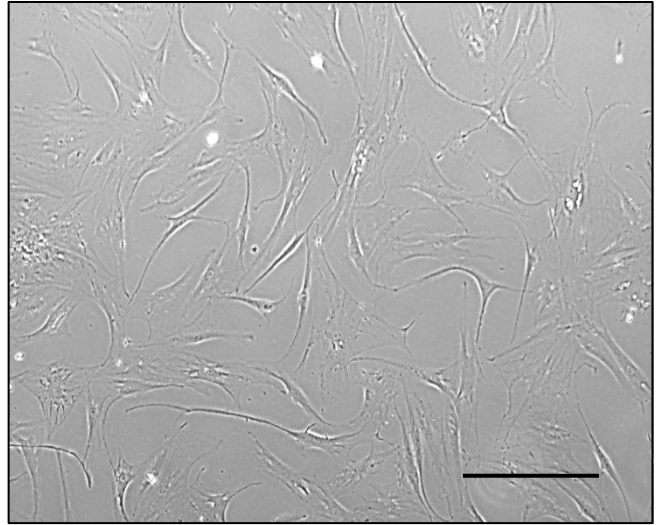

OSA-05

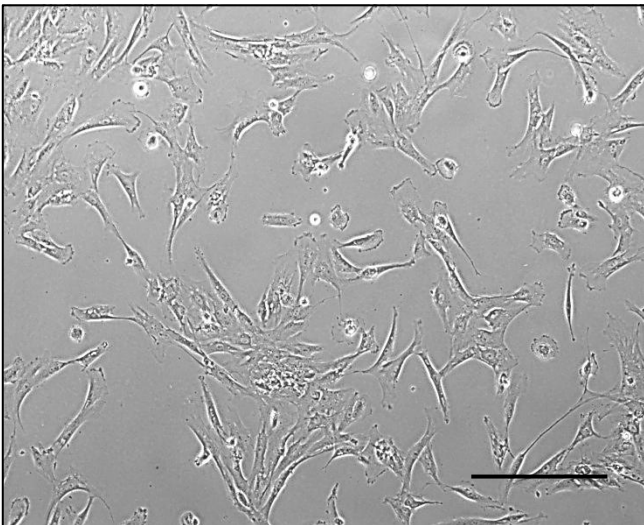

OSA-08

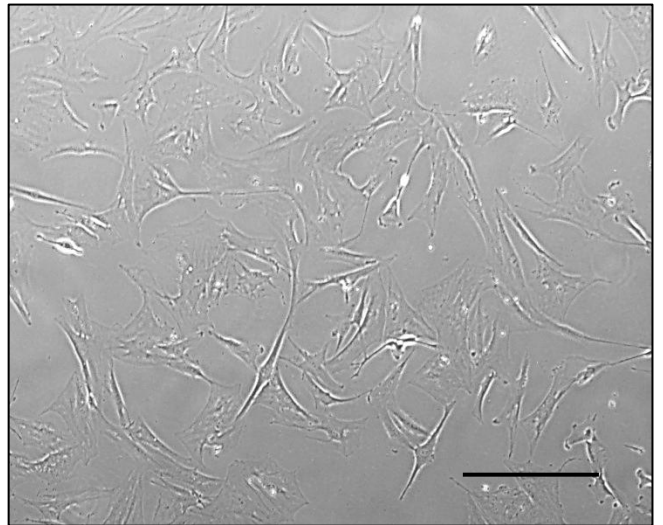

OSA-09

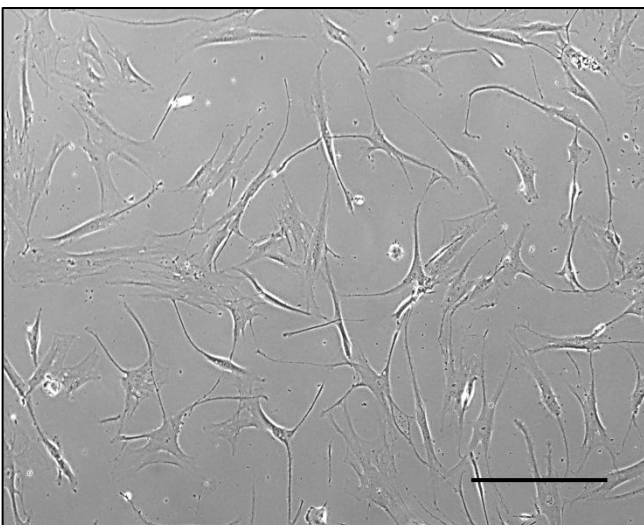

OSA-13

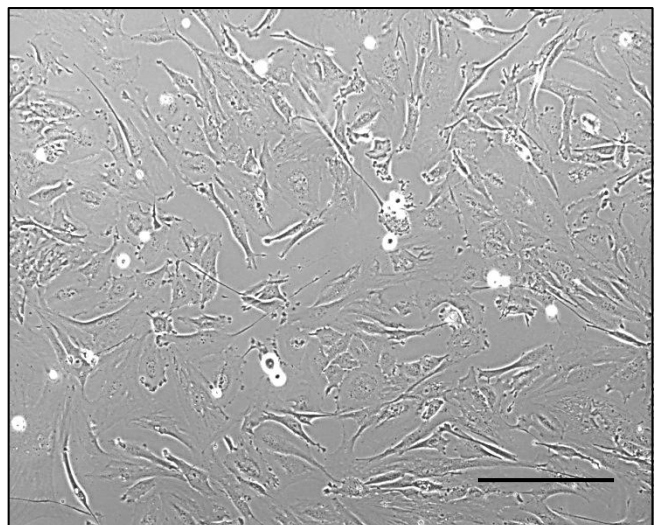

Supplement: s1 [file s1]
